# Supplementary material
Source: publisher figshare collection journal article supplement (https://acs.figshare.com/ndownloader/files/7955038)
Supplement: Supplementary file 1 [file 7955038]

## Supporting Information

Thiol-Reactive Star Polymers Display Enhanced Association with Distinct Human Blood Components

Joshua J. Glass,<sup>†</sup> Yang Li,<sup>‡#</sup> Robert De Rose,<sup>†</sup> Angus P.R. Johnston,<sup>‡</sup> Ewa I. Czuba,<sup>‡</sup> Song Yang Khor,<sup>‡</sup> John F. Quinn,<sup>‡</sup> Michael R. Whittaker,<sup>‡</sup> Thomas P. Davis<sup>‡§\*</sup> and Stephen J. Kent<sup>†⊥\*</sup>

<sup>†</sup> ARC Centre of Excellence in Convergent Bio-Nano Science and Technology, and Department of Microbiology and Immunology, Peter Doherty Institute for Infection and Immunity, The University of Melbourne, Melbourne, VIC 3010, Australia

<sup>‡</sup> ARC Centre of Excellence in Convergent Bio-Nano Science and Technology, and Drug Delivery, Disposition and Dynamics, Monash Institute of Pharmaceutical Sciences, Monash University, Parkville, VIC 3052, Australia

<sup>§</sup> Department of Chemistry, University of Warwick, Gibbet Hill, Coventry, CV4 7AL, UK

<sup>⊥</sup> Melbourne Sexual Health Centre and Department of Infectious Diseases, Alfred Health, Central Clinical School, Monash University, Melbourne, VIC Australia

### Present Address

<sup>#</sup> Beijing Laboratory of Biomedical Materials, Beijing University of Chemical Technology, Beijing 100029, China

Corresponding author email: skent@unimelb.edu.au, thomas.p.davis@monash.edu

**Table S1. Physical characterization summary of POEGA arms and POEGA star polymers.**

| Entry | Polymers            | $M_n^{(a)}$ | $M_n^{(b)}$ | $PDI^{(c)}$ | $D_h$<br>(nm)   |
|-------|---------------------|-------------|-------------|-------------|-----------------|
| 1     | BSPA-POEGA Arm      | 11500       | 8800        | 1.20        | —               |
| 2     | PDSD-POEGA Arm      | 12000       | 9800        | 1.20        | —               |
| 3     | BSPA-POEGA Star     | 119000      | —           | 1.17        | —               |
| 4     | PDSD-POEGA Star     | 123000      | —           | 1.18        | —               |
| 5     | BSPA-POEGA Star-Cy5 | 118000      | —           | 1.24        | 14 (+/- 0.6 SD) |
| 6     | PDSD-POEGA Star-Cy5 | 120000      | —           | 1.20        | 17 (+/- 0.9 SD) |

<sup>(a)</sup> Determined from GPC using DMAC as the mobile phase against polystyrene calibration standards; <sup>(b)</sup> determined from  $^1H$  NMR in  $CDCl_3$ ; <sup>(c)</sup> Determined from Dynamic Light Scattering in 1 mg/mL PBS solution (size from number distribution analysis reported).

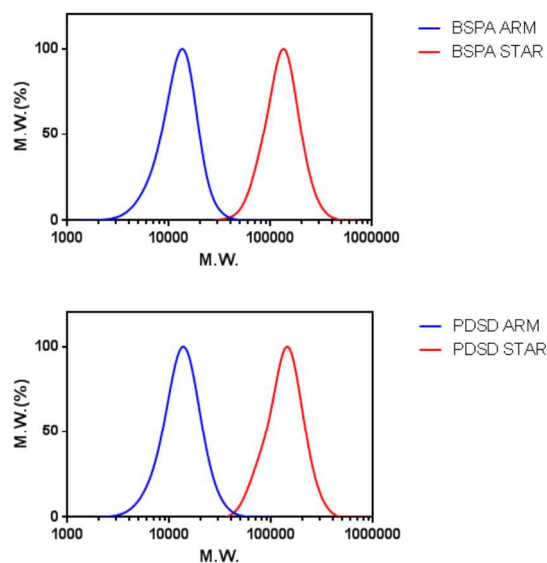

**Figure S1.** GPC analysis for benzyl (top) and pyridyl disulfide (bottom) functional POEGA arms and the corresponding stars.

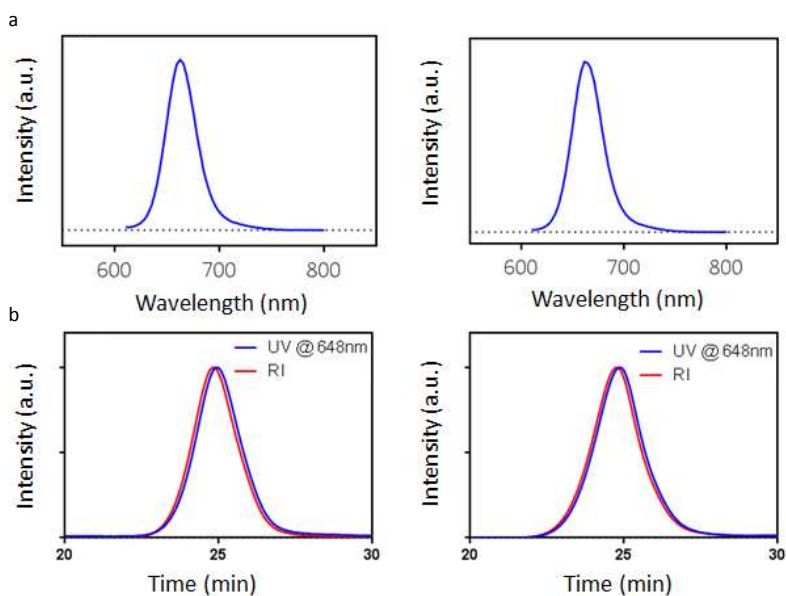

**Figure S2.** (a) Fluorescence spectra of Cy5 labelled benzyl (left) and pyridyl disulfide (right) peripherally functional POEGA stars. (b) GPC chromatograms for Cy5 labelled benzyl (left) and pyridyl disulfide (right) peripherally functional POEGA stars using RI and UV-vis detection ( $\lambda = 648$  nm).
